# Supplementary material for: The Sec1–Munc18 protein VPS33B forms a uniquely bidirectional complex with VPS16B
Source: PubMed Central journal article supplement — J Biol Chem. 2023 Apr 14;299(6):104718. doi: 10.1016/j.jbc.2023.104718 (PMC10208892; doi:10.1016/j.jbc.2023.104718), 2023-04-14
Supplement: mmc1.pdf [file mmc1.pdf]

## Supporting Information

### **The Sec1/Munc18 protein VPS33B forms a uniquely bidirectional complex with VPS16B**

Richard J.Y. Liu<sup>1</sup>, Yusef Al-Molieh<sup>1</sup>, Shao Z. Chen<sup>1</sup>, Marko Drobac<sup>1</sup>, Denisa Urban<sup>1</sup>, Chang H. Chen<sup>1</sup>, Helen H.Y. Yao<sup>1</sup>, Ryan S.Q. Geng<sup>1</sup>, Ling Li<sup>2</sup>, Fred G. Pluthero<sup>2</sup>, Samir Benlekbir<sup>3</sup>, John L. Rubinstein<sup>1,3</sup>, Walter H.A. Kahr<sup>1,2,4,\*</sup>

<sup>1</sup> Department of Biochemistry, University of Toronto, Toronto, ON, M5S 1A8, Canada

<sup>2</sup> Cell Biology Program, Research Institute, Hospital for Sick Children, Toronto, ON, M5G 0A4, Canada.

<sup>3</sup> Molecular Medicine Program, Research Institute, Hospital for Sick Children, Toronto, ON, M5G 0A4, Canada.

<sup>4</sup> Division of Haematology/Oncology, Department of Paediatrics, University of Toronto and The Hospital for Sick Children, Toronto, ON, M5G 1X8, Canada

**Table S1. Mass spectrometry analysis of VPS33B/VPS16B-3xFLAG complex.** Recombinant human VPS33B/VPS16B-3xFLAG complex purified from yeast was recovered from the ~480 kDa band on a stained BN-PAGE gel (Fig. 3C) and subjected to mass spectroscopy.

| Protein Name  | Species                         | Molecular weight (Da) | Exclusive unique peptide count | Exclusive spectrum count | % coverage |
|---------------|---------------------------------|-----------------------|--------------------------------|--------------------------|------------|
| VPS33B        | <i>Homo Sapiens</i>             | 70,588.50             | 57                             | 318                      | 61.90%     |
| VPS16B-3xFLAG | <i>Homo Sapiens</i>             | 60,802.70             | 61                             | 213                      | 65.20%     |
| YFR016C       | <i>Saccharomyces cerevisiae</i> | 137,698.70            | 2                              | 2                        | 2.35%      |

**Table S2. Mass spectrometry analysis of ~70 kDa band from Figure 8A, VPS33B L30P variant lane.**

| Protein Name | Species                         | Molecular weight (Da) | Exclusive unique peptide count | Exclusive spectrum count | % coverage |
|--------------|---------------------------------|-----------------------|--------------------------------|--------------------------|------------|
| SSA2         | <i>Saccharomyces cerevisiae</i> | 69,471.80             | 64                             | 285                      | 73.4       |
| SSB2         | <i>Saccharomyces cerevisiae</i> | 66,595.70             | 40                             | 132                      | 66.9       |
| SSA1         | <i>Saccharomyces cerevisiae</i> | 69,659.40             | 17                             | 49                       | 78.5       |

**A**

## SEC-MALS Scattering

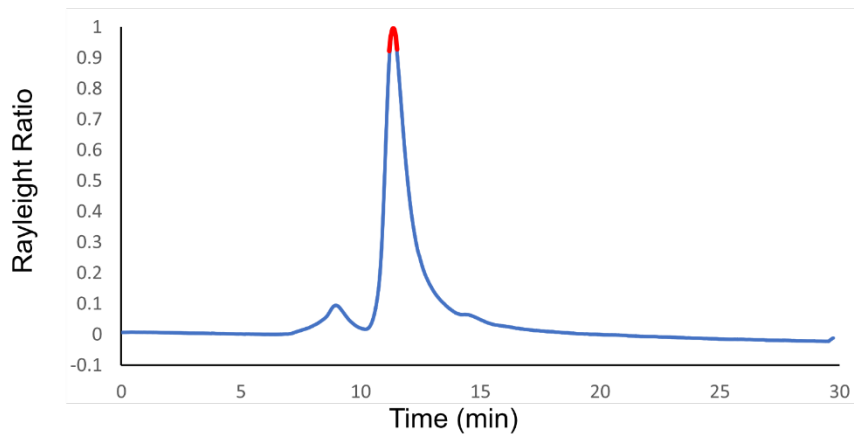**B**

## Calculated Molecular Weight

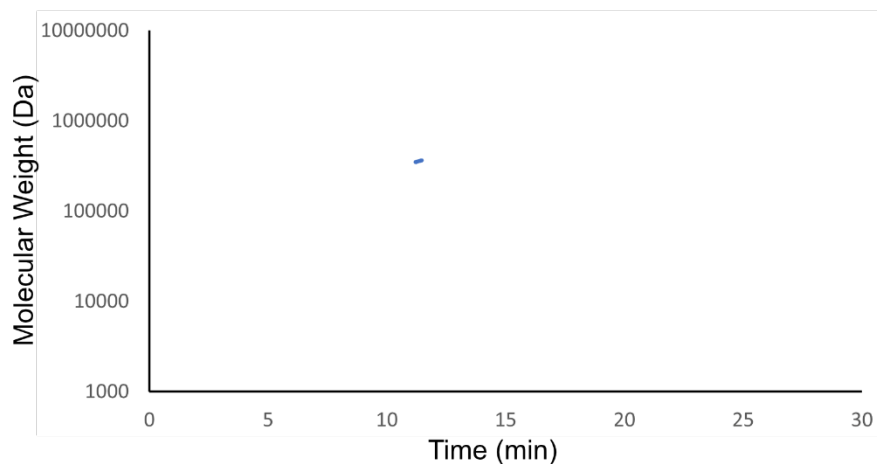

**Figure S1. Molecular weight determination of VPS33B/VPS16B-3xFLAG complex by SEC-MALS.** (A) Representative light scattering data from SEC-MALS analysis of purified VPS33B/VPS16B-3xFLAG (see Figure 3E for SEC results). (B) Data for the complex peak (red) were used to calculate the molecular weight of the complex (logarithmic scale); estimates from 3 independent purifications yielded a mean value of 315 kDa.

**A**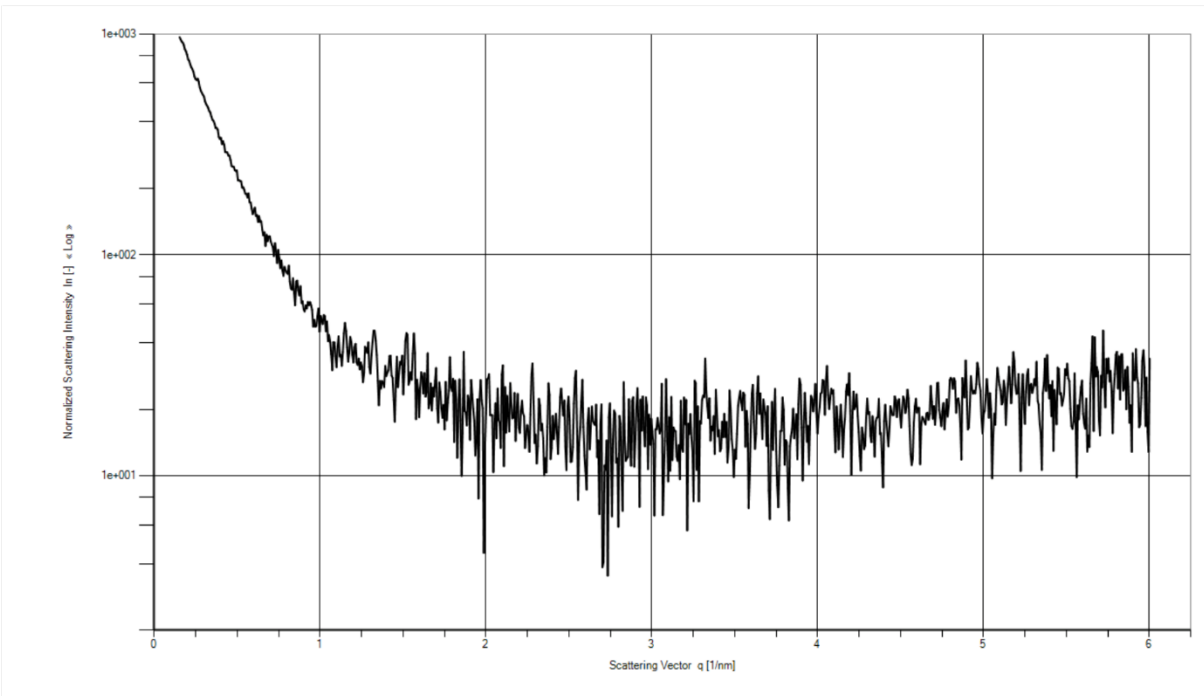**B**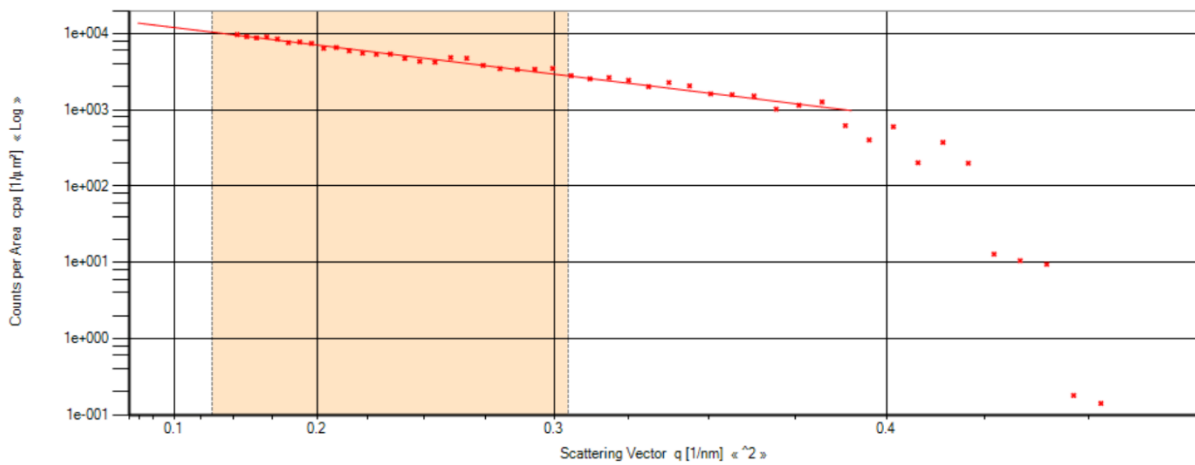

**Figure S2. SAXS analysis of VPS33B/VPS16B-3xFLAG.** (A) Scattering profile of VPS33B/VPS16B-3xFLAG complex. (B) Guinier plot showing linear fit (red line) and region (orange shading) used to calculate the radius of gyration of the complex.

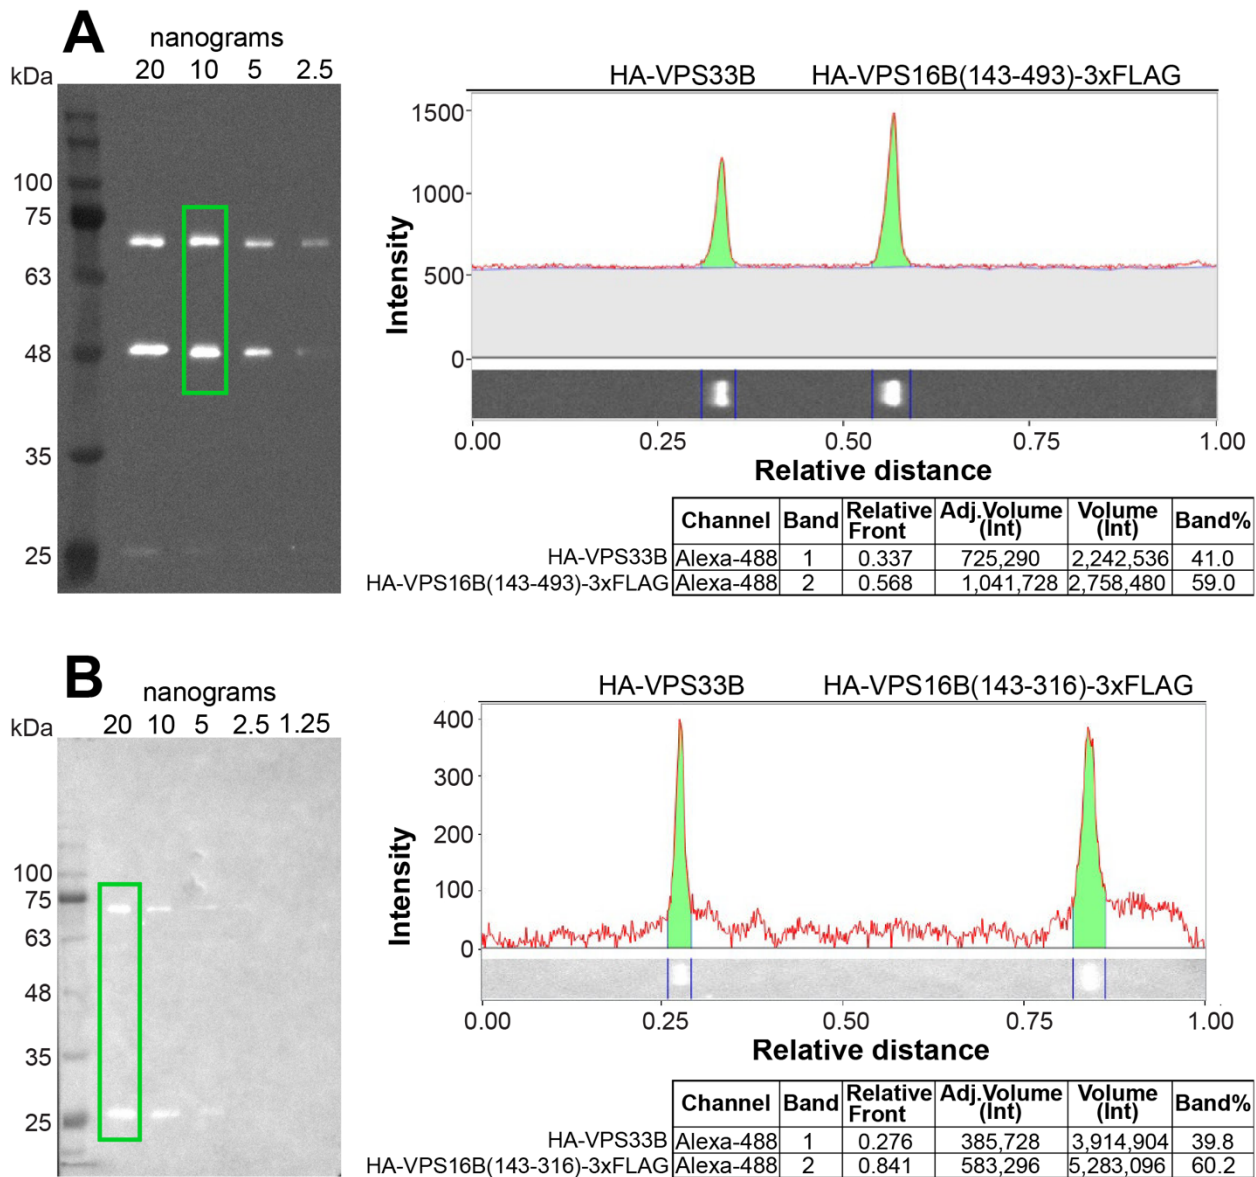

**Figure S3. Quantitative immunoblots of VPS33B/VPS16B complexes containing truncated VPS16B subunits show same component ratio as wild type complex.** SDS-PAGE immunoblots of serially-diluted purified complex were probed with monoclonal anti-HA primary antibody and Alexa Fluor 488-conjugated anti-mouse secondary antibody. Total protein (nanograms) loaded indicated at top of each lane; lanes used for quantification outlined in green. Blots were imaged and quantified as described in Figure 4 for wild type complex. (A) Results for 10 ng complex containing full-length HA-VPS33B and HA-VPS16B(143-493)-3xFLAG show these components account for 41% and 59% of signal respectively, indicating 2 and 3 copies of each in the complex. (B) Results for 20 ng of complex containing HA-VPS33B and HA-VPS16B(143-316)-3xFLAG also indicate presence of 2 and 3 copies respectively.
